# Supplementary material for: Improving Uptake and Sustainability of Sanitation Interventions in Timor-Leste: A Case Study
Source: MDPI journal article supplement (doi:10.3390/ijerph18031013), 2021-01-24
Supplement: s1 [file s1]

## Supplementary Materials: Improving Uptake and Sustainability of Sanitation Interventions in Timor-Leste: A Case Study

Stakeholders were asked to indicate their level of agreement or disagreement with eight statements relating to the roll-out of interventions in communities. Responses were graded from 1–5, with 1 and 2 indicating strong disagreement and disagreement respectively (Figure S1, orange bars), and 4 and 5 indicating agreement and strong agreement respectively (Figure S1, green bars); 3 indicated a neutral response to the statement (Figure S1, grey bars).

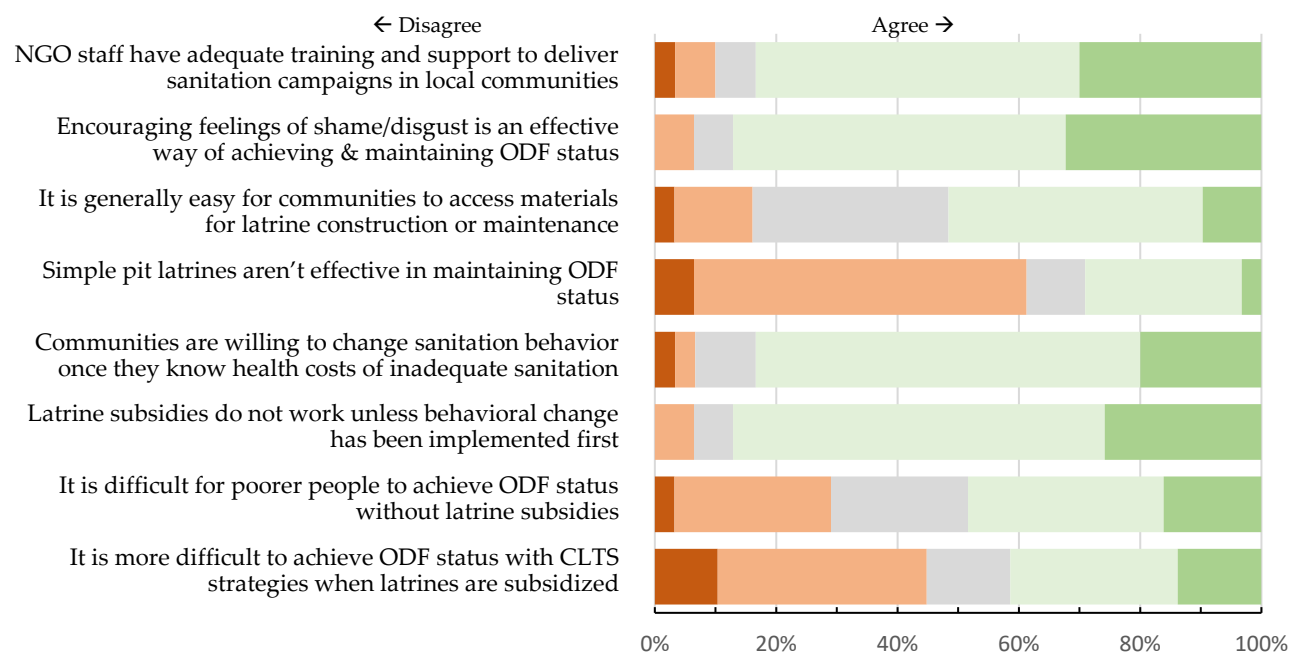

**Figure S1.** Stakeholder opinions in response to statements on sanitation and ODF status. Dark orange and pale orange bars represent strong disagreement and disagreement respectively; dark green and pale green bars represent strong agreement and agreement respectively; grey bars represent a neutral response.
